# Supplementary material
Source: publisher figshare collection journal article supplement (https://acs.figshare.com/ndownloader/files/23707638)
Supplement: Supplementary file 1 [file 23707638]

## Supporting Information

# Defect Mediated Adsorption of Metal Ions for Constructing Ni Hydroxide/MoS<sub>2</sub> Heterostructure as High-Performance Water Splitting Electrocatalysts

Zuyun He<sup>1</sup>, Qiuyu Liu<sup>1</sup>, Yunmin Zhu<sup>1</sup>, Tuo Tan<sup>1</sup>, Liuxuan Cao<sup>2\*</sup>, Shijun Zhao<sup>3</sup>, Yan

Chen<sup>1\*</sup>

<sup>1</sup> School of Environment and Energy, State Key Laboratory of Pulp and Paper Engineering, South China University of Technology, Guangzhou 510006, China

<sup>2</sup>College of Energy, Xiamen University, Xiamen 361005, China

<sup>3</sup> Department of Mechanical Engineering, City University of Hong Kong, Hong Kong, China

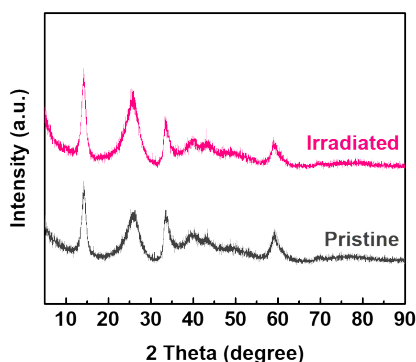

Figure S1. The XRD patterns of the pristine MoS<sub>2</sub> and irradiated MoS<sub>2</sub> nanosheets.

Based on the full width at half maximum (FWHM) value of the (002) diffraction peak, the thickness of MoS<sub>2</sub> nanosheets along the c axis can be calculated using

Scherrer equation:  $D = \frac{K\gamma}{B\cos\theta}$

where K is the Scherrer constant, equaling to 0.89;  $\gamma$  is the wavelength of the X-ray, equaling to 0.154 nm; B is the FWHM value of the (002) diffraction peak;  $\theta$  is the Bragg diffraction angle of (002) plane. The thickness of MoS<sub>2</sub> nanosheets was determined to be 7.1 nm, which corresponded to about 11 S-Mo-S layers

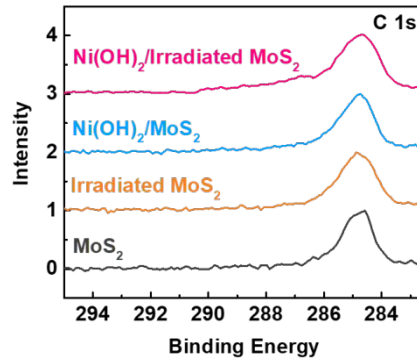

Figure S2. The C 1s XPS spectra of the pristine MoS<sub>2</sub>, irradiated MoS<sub>2</sub>, Ni(OH)<sub>2</sub>/MoS<sub>2</sub> and Ni(OH)<sub>2</sub>/irradiated MoS<sub>2</sub> heterostructure.
